# Supplementary material for: Influence of over-discharge on the lifetime and performance of LiFePO4/graphite batteries
Source: Royal Society of Chemistry journal article supplement (doi:10.1039/c6ra01677d), 2016-01-01
Supplement: c6ra01677d1.pdf [file c6ra01677d1.pdf]

## Supplementary Information

### Influence of over-discharge on the lifetime and performance of

#### LiFePO<sub>4</sub>/graphite batteries

Yong Zheng <sup>a</sup>, Yan-Bing He <sup>b</sup>, Kun Qian <sup>b</sup>, Dan Luo <sup>b</sup>, Yiyang Li <sup>b</sup>, Qingwen Lu <sup>b</sup>,

Baohua Li <sup>b,\*</sup>, Xindong Wang <sup>a</sup>, Jianling Li <sup>a,\*</sup>, Feiyu Kang <sup>b</sup>

<sup>a</sup> *State Key Laboratory of Advanced Metallurgy, University of Science and Technology Beijing,*

*Beijing 100083, China*

<sup>b</sup> *Engineering Laboratory for Next Generation Power and Energy Storage Batteries, Graduate*

*School at Shenzhen, Tsinghua University, Shenzhen 518055, China*

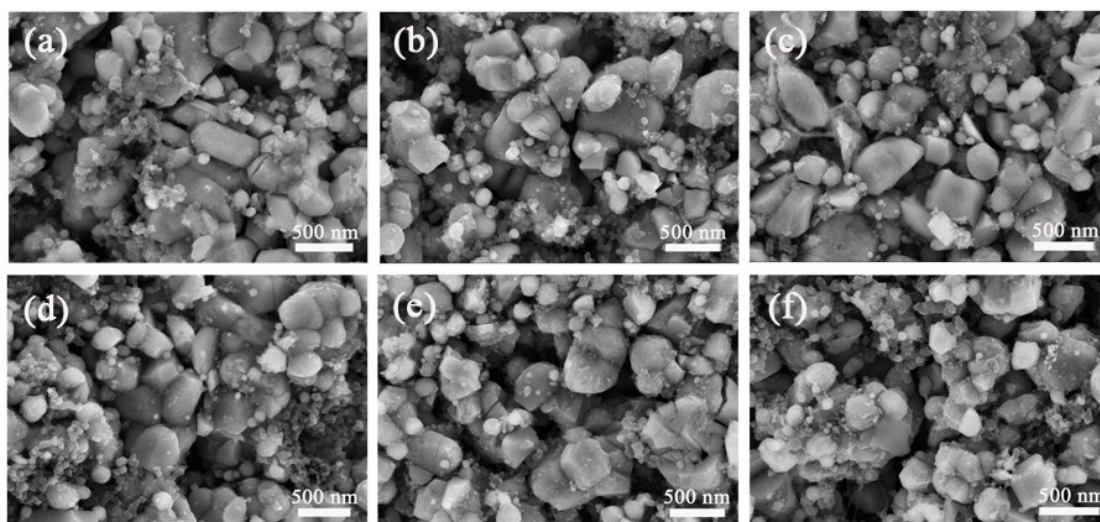

**Fig. S1** SEM images of LiFePO<sub>4</sub> electrodes before and after cycling: (a) Fresh LiFePO<sub>4</sub>, and aged at (b) 2.0 V; (c) 1.5 V; (d) 1.0 V; (e) 0.5 V and (f) 0.0 V.

---

\*Corresponding author: Baohua Li . Tel. / fax.: +86 755 26036419. E-mail address: libh@mail.sz.tsinghua.edu.cn.  
Jianling Li . Tel. / fax.: +86 10 62332651. E-mail address: lijianling@ustb.edu.cn.

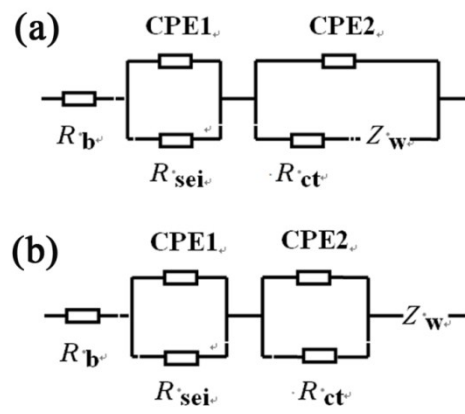

**Fig. S2** Equivalent circuit models for fitting the LiFePO<sub>4</sub>/graphite power batteries.
